# Supplementary material for: Techno-economic analysis of production of octane booster components derived from lignin
Source: Springer Nature journal article supplement (doi:10.1007/s13399-023-05255-w), 2024-01-16
Supplement: MOESM1 [file 26634260]

**Techno-economic analysis of production of octane booster components derived from lignin**

Zi Wei Ng1,King Yee Yeoh1, Rendra Hakim Hafyan2, Aditya Putranto2*, Bahman Amini Horri2, Sharif H. Zein3,M Akbar Rhamdhani4, Muhammad Aziz5, Ivan Butar6

1Discipline of Chemical Engineering, School of Engineering, Monash University, Bandar Sunway, Malaysia

2Department of Chemical and Process Engineering, School of Chemistry and Chemical Engineering, University of Surrey, Guildford GU2 7XH, United Kingdom

3Department of Chemical Engineering, Faculty of Science and Engineering, University of Hull , Kingston Upon Hull, HU6 7RX, UK

4Department of Mechanical Engineering and Product Design Engineering, School of Engineering, Swinburne University of Technology, John St, Hawthorn VIC 3122, Australia

5Institute of Industrial Science, The University of Tokyo, 4-6-1 Komaba, Meguro-ku, Tokyo, 153-8505, Japan

6Monash University, BSD Campus, Serpong, Banten, Indonesia

*Corresponding author: [a.putranto@surrey.ac.uk](mailto:a.putranto@surrey.ac.uk)

# Appendix A Mass energy balances

**Table A.1.** Mass energy balances for co-production of phenol and acetophenone from lignin

| **Parameters** | **Units** | **S1** | **S2** | **S3** | **S4** | **S5** | **S6** | **S7** | **S8** | **S9** | **S10** |
| --- | --- | --- | --- | --- | --- | --- | --- | --- | --- | --- | --- |
| **Temperature** | C | 30.00 | 30.00 | 270.00 | 130.00 | 130.00 | 130.00 | 130.00 | 130.00 | 129.93 | 157.78 |
| **Pressure** | bar | 1.01 | 1.01 | 1.01 | 1.01 | 1.01 | 1.01 | 1.01 | 1.01 | 0.40 | 0.40 |
| **Total Mass Flow** | kg/hr | 107.527 | 1.470 | 148.931 | 148.931 | 1.991 | 146.940 | 42.034 | 104.905 | 104.905 | 50.378 |
| **Component Mass Flow** |  |  |  |  |  |  |  |  |  |  |  |
| LIGNIN | kg/hr | 100.000 | 0.000 | 34.522 | 34.522 | 0.000 | 34.522 | 34.522 | 0.000 | 0.000 | 0.000 |
| PHENOL | kg/hr | 0.000 | 0.000 | 47.181 | 47.181 | 0.309 | 46.873 | 0.878 | 45.995 | 45.995 | 44.038 |
| AP | kg/hr | 0.000 | 0.000 | 60.228 | 60.228 | 0.250 | 59.978 | 1.123 | 58.855 | 58.855 | 6.284 |
| H2O | kg/hr | 7.527 | 0.000 | 0.000 | 0.000 | 0.000 | 0.000 | 0.000 | 0.000 | 0.000 | 0.000 |
| CO2 | kg/hr | 0.000 | 0.000 | 0.745 | 0.745 | 0.700 | 0.045 | 0.001 | 0.044 | 0.044 | 0.044 |
| CO | kg/hr | 0.000 | 0.000 | 0.745 | 0.745 | 0.733 | 0.011 | 0.000 | 0.011 | 0.011 | 0.011 |
| CARBON | kg/hr | 0.000 | 0.000 | 5.510 | 5.510 | 0.000 | 5.510 | 5.510 | 0.000 | 0.000 | 0.000 |
| H2 | kg/hr | 0.000 | 1.470 | 0.000 | 0.000 | 0.000 | 0.000 | 0.000 | 0.000 | 0.000 | 0.000 |
| DOWTH-01 | kg/hr | 0.000 | 0.000 | 0.000 | 0.000 | 0.000 | 0.000 | 0.000 | 0.000 | 0.000 | 0.000 |
| **Component Mass Fraction** |  |  |  |  |  |  |  |  |  |  |  |
| LIGNIN |  | 0.930 | 0.000 | 0.232 | 0.232 | 0.000 | 0.235 | 0.821 | 0.000 | 0.000 | 0.000 |
| PHENOL |  | 0.000 | 0.000 | 0.317 | 0.317 | 0.155 | 0.319 | 0.021 | 0.438 | 0.438 | 0.874 |
| AP |  | 0.000 | 0.000 | 0.404 | 0.404 | 0.126 | 0.408 | 0.027 | 0.561 | 0.561 | 0.125 |
| H2O |  | 0.070 | 0.000 | 0.000 | 0.000 | 0.000 | 0.000 | 0.000 | 0.000 | 0.000 | 0.000 |
| CO2 |  | 0.000 | 0.000 | 0.005 | 0.005 | 0.351 | 3.05E-04 | 2.00E-05 | 4.20E-04 | 4.20E-04 | 8.74E-04 |
| CO |  | 0.000 | 0.000 | 0.005 | 0.005 | 0.368 | 7.80E-05 | 5.10E-06 | 1.07E-04 | 1.07E-04 | 2.23E-04 |
| CARBON |  | 0.000 | 0.000 | 0.037 | 0.037 | 0.000 | 0.038 | 0.131 | 0.000 | 0.000 | 0.000 |
| H2 |  | 0.000 | 1.000 | 0.000 | 0.000 | 0.000 | 0.000 | 0.000 | 0.000 | 0.000 | 0.000 |
| DOWTH-01 |  | 0.000 | 0.000 | 0.000 | 0.000 | 0.000 | 0.000 | 0.000 | 0.000 | 0.000 | 0.000 |

**Table A.2.** Mass energy balances for co-production of phenol and acetophenone from lignin (continued).

| **Parameters** | **Units** | **S11** | **S12** | **S13** | **S14** | **S15** | **S16** | **S17** | **S18** | **S19** | **S20** |
| --- | --- | --- | --- | --- | --- | --- | --- | --- | --- | --- | --- |
| **Temperature** | C | 168.32 | 78.27 | 72.97 | 79.46 | 79.46 | 79.46 | 79.52 | 113.22 | 130.00 | 130.00 |
| **Pressure** | bar | 0.40 | 0.01 | 0.01 | 0.01 | 0.01 | 0.01 | 0.40 | 0.40 | 1.01 | 1.01 |
| **Total Mass Flow** | kg/hr | 110.779 | 110.779 | 48.278 | 62.501 | 6.250 | 56.251 | 56.251 | 161.157 | 39.933 | 2.102 |
| **Component Mass Flow** |  |  |  |  |  |  |  |  |  |  |  |
| LIGNIN | kg/hr | 0.000 | 0.000 | 0.000 | 0.000 | 0.000 | 0.000 | 0.000 | 0.000 | 32.796 | 1.726 |
| PHENOL | kg/hr | 19.572 | 19.572 | 0.000 | 19.572 | 1.957 | 17.615 | 17.615 | 63.610 | 0.834 | 0.044 |
| AP | kg/hr | 91.207 | 91.207 | 48.278 | 42.929 | 4.293 | 38.636 | 38.636 | 97.491 | 1.067 | 0.056 |
| H2O | kg/hr | 0.000 | 0.000 | 0.000 | 0.000 | 0.000 | 0.000 | 0.000 | 0.000 | 0.000 | 0.000 |
| CO2 | kg/hr | 0.000 | 0.000 | 0.000 | 0.000 | 0.000 | 0.000 | 0.000 | 0.044 | 0.001 | 0.000 |
| CO | kg/hr | 0.000 | 0.000 | 0.000 | 0.000 | 0.000 | 0.000 | 0.000 | 0.011 | 0.000 | 0.000 |
| CARBON | kg/hr | 0.000 | 0.000 | 0.000 | 0.000 | 0.000 | 0.000 | 0.000 | 0.000 | 5.235 | 0.276 |
| H2 | kg/hr | 0.000 | 0.000 | 0.000 | 0.000 | 0.000 | 0.000 | 0.000 | 0.000 | 0.000 | 0.000 |
| DOWTH-01 | kg/hr | 0.000 | 0.000 | 0.000 | 0.000 | 0.000 | 0.000 | 0.000 | 0.000 | 0.000 | 0.000 |
| **Component Mass Fraction** |  |  |  |  |  |  |  |  |  |  |  |
| LIGNIN |  | 0.000 | 0.000 | 0.000 | 0.000 | 0.000 | 0.000 | 0.000 | 0.000 | 0.821 | 0.821 |
| PHENOL |  | 0.177 | 0.177 | 9.87E-11 | 0.313 | 0.313 | 0.313 | 0.313 | 0.395 | 0.021 | 0.021 |
| AP |  | 0.823 | 0.823 | 0.999 | 0.687 | 0.687 | 0.687 | 0.687 | 0.605 | 0.027 | 0.027 |
| H2O |  | 0.000 | 0.000 | 0.000 | 0.000 | 0.000 | 0.000 | 0.000 | 0.000 | 0.000 | 0.000 |
| CO2 |  | 1.07E-137 | 1.07E-137 | 0.000 | 0.000 | 0.000 | 0.000 | 0.000 | 2.73E-04 | 2.00E-05 | 2.00E-05 |
| CO |  | 9.16E-161 | 9.16E-161 | 0.000 | 0.000 | 0.000 | 0.000 | 0.000 | 6.98E-05 | 5.10E-06 | 5.10E-06 |
| CARBON |  | 0.000 | 0.000 | 0.000 | 0.000 | 0.000 | 0.000 | 0.000 | 0.000 | 0.131 | 0.131 |
| H2 |  | 0.000 | 0.000 | 0.000 | 0.000 | 0.000 | 0.000 | 0.000 | 0.000 | 0.000 | 0.000 |
| DOWTH-01 |  | 0.000 | 0.000 | 0.000 | 0.000 | 0.000 | 0.000 | 0.000 | 0.000 | 0.000 | 0.000 |

**Table A.3.** Mass energy balances for co-production of phenol and acetophenone from lignin (continued).

| **Parameters** | **Units** | **S21** | **S22** | **S23** |
| --- | --- | --- | --- | --- |
| **Temperature** | C | 270.00 | 55.96 | 270.00 |
| **Pressure** | bar | 1.01 | 1.01 | 1.01 |
| **Total Mass Flow** | kg/hr | 1.470 | 147.461 | 147.461 |
| **Component Mass Flow** |  |  |  |  |
| LIGNIN | kg/hr | 0.000 | 132.797 | 132.797 |
| PHENOL | kg/hr | 0.000 | 0.834 | 0.834 |
| AP | kg/hr | 0.000 | 1.067 | 1.067 |
| H2O | kg/hr | 0.000 | 7.527 | 7.527 |
| CO2 | kg/hr | 0.000 | 0.001 | 0.001 |
| CO | kg/hr | 0.000 | 0.000 | 0.000 |
| CARBON | kg/hr | 0.000 | 5.235 | 5.235 |
| H2 | kg/hr | 1.470 | 0.000 | 0.000 |
| DOWTH-01 | kg/hr | 0.000 | 0.000 | 0.000 |
| **Component Mass Fraction** |  |  |  |  |
| LIGNIN | - | 0.000 | 0.901 | 0.901 |
| PHENOL | - | 0.000 | 0.006 | 0.006 |
| AP | - | 0.000 | 0.007 | 0.007 |
| H2O | - | 0.000 | 0.051 | 0.051 |
| CO2 | - | 0.000 | 5.41E-06 | 5.41E-06 |
| CO | - | 0.000 | 1.38E-06 | 1.38E-06 |
| CARBON | - | 0.000 | 0.036 | 0.036 |
| H2 | - | 1.000 | 0.000 | 0.000 |
| DOWTH-01 | - | 0.000 | 0.000 | 0.000 |

# Appendix B: Equipment Cost Calculation and Fixed Capital Investment

The cost of distillation column, PSD1 on a US Gulf Coast basis (2006) can be calculated as

where cost of pressure vessel can be calculated as [1]

where a is -10000, b is 600, n is 0.6, and S is sizing parameter value or pressure vessel [1].

Furthermore, cost of trays can be calculated as [1]

where a is 100, b is 120, n is 2 and S is sizing parameter value or tray diameter [1].

The similar calculation is done for PSD2.

The costs of equipment in 2021 that in Southeast Asia is calculated as

where CEPCI is chemical engineering plant cost index which is based on the basis year of equipment cost calculation (499.6 in 2006, 576.1 in 2014 and 754.7 in 2021) and location factor is 1.12 for Southeast Asia [1, 2].

***Table B.1.*** *Equipment size and total equipment cost.*

| **Equipment Tag** | **Equipment Type** | **Number of Equipment** | **Material of Construction** | **Sizing Parameter** | **Parameter Value** | **Parameter Unit** | **Cost (USD)** [3] | **Year** | **CEPCI** | **Cost in 2021 (USD)** |
| --- | --- | --- | --- | --- | --- | --- | --- | --- | --- | --- |
| H1 | Heat exchanger | 1 | SS 304 | Heat transfer area | 0.106 | m2 | 2900.00 | 2014 | 576.1 | 2479.36 |
| H2 | Heat exchanger | 1 | SS 304 | Heat transfer area | 0.177 | m2 | 3800.00 | 2014 | 576.1 | 3248.82 |
| H3 | Heat exchanger | 1 | SS 304 | Heat transfer area | 1.003 | m2 | 8500.00 | 2014 | 576.1 | 7267.09 |
| R1 | Reactor | 1 | SS 304 | Volume | 28.67 | m3 | 114000.00 | 2014 | 576.1 | 97464.49 |
| F1 | Flash separator | 1 | Carbon steel | Diameter | 0.011 | m | 1100.00 | 2014 | 576.1 | 940.45 |
| CF1 | Centrifuge | 1 | SS 304 | Diameter | 0.508 | m | 19700.00 | 2014 | 576.1 | 16842.55 |
| SP1 | Splitter | 1 | SS 304 | - | - | - | 10.92a | 2021 | 754.7 | 12.23 |
| V1 | Valve | 1 | SS 316L | Nominal diameter | 12.7 | mm | 372.45b | 2021 | 754.7 | 417.14 |
| M1 | Mixer | 1 | SS 304 | Shell mass | 24.03 | kg | 5500.00 | 2014 | 576.1 | 4702.23 |
| M2 | Mixer | 1 | SS 304 | Shell mass | 36.81 | kg | 6000.00 | 2014 | 576.1 | 5129.71 |
| PSD1 | Distillation column | 1 | SS 304 | Pressure vessel mass | 4237.08 | kg | 114830.83c | 2006 | 499.6 | 85138.23 |
| Trays diameter | 2 | m |
| V2 | Valve | 1 | SS 316L | Nominal diameter | 12.7 | mm | 372.45b | 2021 | 754.7 | 417.14 |
| PSD2 | Distillation column | 1 | SS 304 | Pressure vessel mass | 14519.89 | kg | 299707.77c | 2006 | 499.6 | 222210.26 |
| Trays diameter | 4 | m |
| SP2 | Splitter | 1 | SS 304 | - | - | - | 10.92a | 2021 | 754.7 | 12.23 |
| P1 | Pump | 1 | SS 304 | Discharge pipe diameter | 0.005 | m | 2200.00 | 2014 | 576.1 | 1880.89 |
| Vacuum system | | | | | | | | | | |
|  | Ejector | 2 | Carbon steel | Diameter | 0.03 | m | 1400.00 | 2014 | 576.1 | 1196.93 |
| Utilities | | | | | | | | | | |
|  | Fired heater 1 | 1 | SS 304 | Heat duty | 1.42 | kW | 1000.00 | 2014 | 576.1 | 854.95 |
|  | Fired heater 2 | 1 | SS 304 | Heat duty | 19.71 | kW | 9000.00 | 2014 | 576.1 | 7694.56 |
|  | Cooling tower | 1 | Carbon steel | Cooling load | 23.85 | kW | 21600.00 | 2014 | 576.1 | 18466.96 |
| **Total Equipment cost (USD)** | | | | | | | | | | **476376.22** |

a. The cost of splitter SP1 and SP2 are 10.92 USD each on a US Gulf Coast basis (2021) [4].

b. The cost of valve V1 and V2 are 372.45 USD each on a US Gulf Coast basis (2021) [5].

c. The cost of distillation column PSD1 and PSD2 are 114830.83 and 299707.77 USD respectively on US Gulf Coast basis (2021) [1].

***Table B.2.*** *Factors of cost considered in fixed capital investment [1, 6].*

| **Direct cost** | **Factor of purchased equipment cost** | **Percentage of Fixed Capital Investment (%)** | **Cost(USD)** |
| --- | --- | --- | --- |
| Purchased equipment | 1.00 | 0.17 | 476376.22 |
| Equipment installation | 0.39 | 0.07 | 185786.73 |
| Instrumentation and controls | 0.13 | 0.02 | 61928.91 |
| Piping | 0.31 | 0.05 | 147676.63 |
| Electrical | 0.10 | 0.02 | 47637.62 |
| Buildings | 0.29 | 0.05 | 138149.10 |
| Yard improvements | 0.10 | 0.02 | 47637.62 |
| Service facilities | 0.55 | 0.10 | 262006.92 |
| **Total** | - | 0.50 | 1367199.75 |
| **Indirect Cost** | **Factor of purchased equipment cost** |  | **Cost(USD)** |
| Engineering and supervision | 0.32 | 0.06 | 152440.39 |
| Construction expenses | 0.34 | 0.06 | 161967.91 |
| **Total** |  | 0.12 | 314408.31 |
| **Inside Battery Limit (IBL) cost** | **Sum of direct and indirect cost** | 0.62 | 1681608.06 |
| **Outside Battery Limit (OBL) cost** | **35% of IBL cost** | 0.22 | 588562.82 |
| **Others** | **Factor of IBL and OBL total cost** |  | **Cost(USD)** |
| Engineering cost | 0.10 | 0.08 | 227017.09 |
| Contingency | 0.10 | 0.08 | 227017.09 |
| **Total Fixed Capital Investment (USD)** | | | **2724205.05** |

# Appendix C: Operating Cost Calculation

***Table C.1.*** *Summary of operating cost.*

| **Operating Cost Summary** | | | | |
| --- | --- | --- | --- | --- |
| Main Product | | Acetophenone | | |
| Side Product | | Phenol | | |
| Process Route | | Catalytic hydrogenolysis of lignin | | |
| Acetophenone Plant Capacity (tonne/yr) | | 405.55 | | |
| Phenol Plant Capacity (tonne/yr) | | 423.19 | | |
| Capacity Utilization (%) | | 100.00 | | |
| Fixed Capital IBL (million USD) | | 1.68 | | |
| Fixed Capital OBL (million USD) | | 0.59 | | |
| Total Fixed Capital Investment (million USD) | | 2.72 | | |
| Acetophenone Selling Price (USD/tonne) | | 3000.00 | | |
| Phenol Selling Price (USD/tonne) | | 2000.00 | | |
| **Manufacturing Cost** |  |  | Cost per tonne (USD/tonne acetophenone) | Annual Cost (million USD/yr) |
|  |
| **Raw Materials** | Unit Usage (tonne Raw Material/tonne Acetophenone) | Unit Cost (USD/tonne Raw Material) |  |  |  |
|  |
| Lignin | 2.23 | 380.00 | 846.34 | 0.34324 |  |
| Nickel Hydrotalcite | 0.11 | 1050.00 | 116.93 | 0.00948 |  |
| **Total Raw Materials Cost** | | | **963.27** | **0.353** |  |
|  |
| **Utilities** | Unit Usage (Unit/tonne Acetophenone) | Unit Cost (USD/Unit) |  |  |  |
|  |
| Electricity, kWh (first 200 kWh) | 0.49 | 0.09 | 0.04 | 0.00002 |  |
| Electricity, kWh (201 kWh onward) | 6.14 | 0.11 | 0.65 | 0.00026 |  |
| Cooling Water, m3 (first 35 m3) | 1.09 | 0.12 | 0.13 | 0.00005 |  |
| Natural Gas, GJ | 1.58 | 5.50 | 8.67 | 0.00352 |  |
| **Total Utilities Cost** | | | **9.50** | **0.004** |  |
| **Process Labour** | Number | Salary (USD/yr) | Cost per tonne (USD/tonne acetophenone) | Annual Cost (million USD/yr) |  |
|  |
| Operator per Shift | 4 |  |  |  |  |
| Shift Teams | 4 |  |
| Total Shift Operators | 16 | 6566.40 | 259.06 | 0.11 |  |
| Day Operators | 0 |  |  |  |  |
| **Total Process Labour Wages** | | | **259.06** | **0.11** |  |
| Payroll Overheads | 40 % of Wages | | 103.62 | 0.04202 |  |
|  | % of IBL Fixed Capital | % of Labour |  |  |  |
| Maintenance Labour | 2.00 |  | 82.93 | 0.03363 |  |
| Maintenance Materials | 2.00 | 82.93 | 0.03363 |  |
| Operating Supplies |  | 10.00 | 44.56 | 0.01807 |  |
| Plant Overheads | 65.00 | 289.65 | 0.11747 |  |
| Insurance | 1.50 |  | 62.20 | 0.02522 |  |
| Property Taxes | 1.50 | 62.20 | 0.02522 |  |
| Book Depreciation | 10.00 | 414.65 | 0.16816 |  |
| **Total Manufacturing Cost** | | **Fixed** | **1401.79** | **0.57** |  |
| **Variable** | **972.77** | **0.36** |  |
| **Total** | **2374.56** | **0.93** |  |
| **Non-Manufacturing Costs** | % of Total Manufacturing Cost | |  |  |  |
| Corporate Administration | 4.50 | | 106.86 | 0.04334 |  |
| Research and Development | 3.00 | | 71.24 | 0.02889 |  |
| Selling Expenses | 10.00 | | 237.46 | 0.09630 |  |
| **Total Operating Cost** | | | **2790.11** | **1.09** |  |

# Appendix D: Working Capital Calculation

***Table D.1.*** *Summary of working capital.*

| **Working Capital Summary** | | | | | |
| --- | --- | --- | --- | --- | --- |
| **Products** | Annual Production (tonne Product/yr) | | | | |
| Acetophenone | 405.55 | | | | |
| Phenol | 423.19 | | | | |
| **Raw Material Stock** | | | | | |
| **Raw Materials** | Inventory (Weeks) | Unit Usage (tonne Raw Material/tonne Acetophenone) | Unit Cost (USD/tonne Raw Material) | Unit Cost (million USD/yr) | Value (million USD) |
| Lignin | 3 | 2.23 | 380.00 | 0.34 | 0.02 |
| Nickel Hydrotalcite | 260 | 0.11 | 1050.00 | 0.05 | 0.24 |
| **Total Raw Material Stock** | | | | | **0.26** |
| **Product Stock** | | | | | |
| **Product** | Inventory (Weeks) | Unit Produced (tonne Product/tonne Acetophenone) | Unit Value (USD/tonne Product) | Product Cash Cost (million USD/yr) | Value (million USD) |
| Acetophenone | 3 | 1.00 | 3000.00 | 1.22 | 0.07 |
| Phenol | 3 | 1.04 | 2000.00 | 0.85 | 0.05 |
| **Total Product Stock** | | | | | **0.12** |
| **Debtors** | | | | | |
| **Debtors** | Period (Weeks) |  | | Product Cash Cost (million USD/yr) | Value (million USD) |
| Acetophenone | 6 | 2.43 | 0.28 |
| Phenol | 6 | 1.69 | 0.20 |
| **Total Debt** | | | | | **0.48** |
| **Creditors** | | | | | |
| **Creditor** | Period (Weeks) | Unit Usage (Unit/tonne Acetophenone) | Unit Cost (USD/Unit) | Unit Cost (million USD/yr) | Value (million USD) |
| Raw materials | | | | | |
| Lignin, tonne | 6 | 2.23 | 380.00 | 0.34 | 0.04 |
| Nickel Hydrotalcite, tonne | 260 | 0.11 | 1050.00 | 0.05 | 0.24 |
| Utilities | | | | | |
| Electricity, kWh (first 200 kWh) | 6 | 0.49 | 0.09 | 0.00002 | 0.000002 |
| Electricity, kWh (201 kWh onward) | 6 | 6.14 | 0.11 | 0.00026 | 0.000030 |
| Cooling Water, m3 | 6 | 1.09 | 0.12 | 0.00005 | 0.000006 |
| Natural Gas, GJ | 6 | 1.58 | 5.50 | 0.00352 | 0.000406 |
| **Total Credit** | | | | | **0.28** |
| **Total Working Capital** | | | | | **0.57** |

# Appendix E: Cumulative Cash Flow

***Table E.1.*** *Cumulative cash flow table for lignin to acetophenone process plant with 20 operating years.*


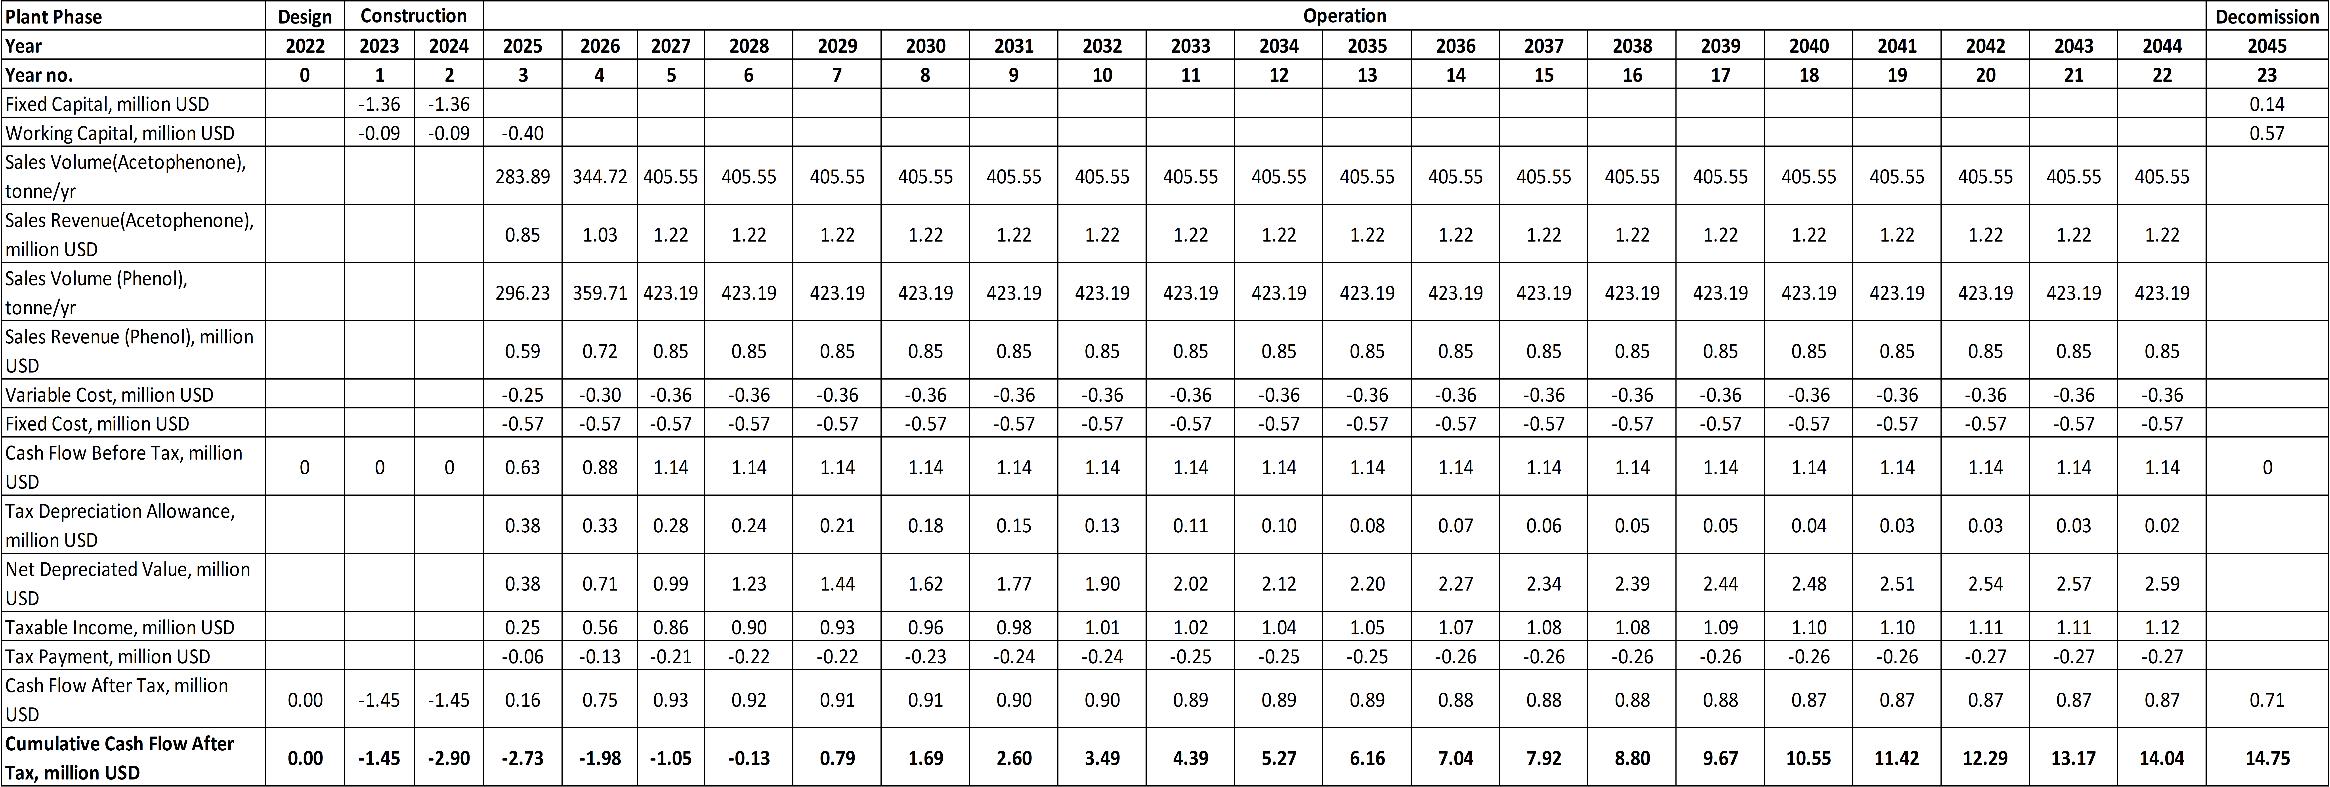


# Appendix F: Net Present Value, Internal Rate of Return and Return of Investment

Using a discount rate of 5%, the discounted cash flow after tax is calculated as

where n is year, Cn is the cash flow after tax at year n and i is discount rate. Using year 1 as an example,

The same calculation is done for the remaining years. After that, by summing up the discounted cash flow after tax of each year, the NPV is calculated to be 6.9 million USD.

***Table F.1.*** *NPV of plant at varying discount rate.*

| **Year No.** | **Discounted Cash Flow After Tax at Different Discount Rate (million USD)** | | | | | |
| --- | --- | --- | --- | --- | --- | --- |
| **Discount rate(%)** | | | | | |
| **0.00** | **5.00** | **10.00*** | **15.00** | **20.00** | **22.73** |
| 1 | -1.45 | -1.38 | -1.32 | -1.26 | -1.21 | -1.18 |
| 2 | -1.45 | -1.31 | -1.20 | -1.10 | -1.01 | -0.96 |
| 3 | 0.16 | 0.14 | 0.12 | 0.11 | 0.10 | 0.09 |
| 4 | 0.75 | 0.62 | 0.51 | 0.43 | 0.36 | 0.33 |
| 5 | 0.93 | 0.73 | 0.58 | 0.46 | 0.37 | 0.33 |
| 6 | 0.92 | 0.69 | 0.52 | 0.40 | 0.31 | 0.27 |
| 7 | 0.91 | 0.65 | 0.47 | 0.34 | 0.26 | 0.22 |
| 8 | 0.91 | 0.61 | 0.42 | 0.30 | 0.21 | 0.18 |
| 9 | 0.90 | 0.58 | 0.38 | 0.26 | 0.17 | 0.14 |
| 10 | 0.90 | 0.55 | 0.35 | 0.22 | 0.14 | 0.12 |
| 11 | 0.89 | 0.52 | 0.31 | 0.19 | 0.12 | 0.09 |
| 12 | 0.89 | 0.49 | 0.28 | 0.17 | 0.10 | 0.08 |
| 13 | 0.89 | 0.47 | 0.26 | 0.14 | 0.08 | 0.06 |
| 14 | 0.88 | 0.45 | 0.23 | 0.12 | 0.07 | 0.05 |
| 15 | 0.88 | 0.42 | 0.21 | 0.11 | 0.06 | 0.04 |
| 16 | 0.88 | 0.40 | 0.19 | 0.09 | 0.05 | 0.03 |
| 17 | 0.88 | 0.38 | 0.17 | 0.08 | 0.04 | 0.03 |
| 18 | 0.87 | 0.36 | 0.16 | 0.07 | 0.03 | 0.02 |
| 19 | 0.87 | 0.35 | 0.14 | 0.06 | 0.03 | 0.02 |
| 20 | 0.87 | 0.33 | 0.13 | 0.05 | 0.02 | 0.01 |
| 21 | 0.87 | 0.31 | 0.12 | 0.05 | 0.02 | 0.01 |
| 22 | 0.87 | 0.30 | 0.11 | 0.04 | 0.02 | 0.01 |
| 23 | 0.71 | 0.23 | 0.08 | 0.03 | 0.01 | 0.01 |
| **NPV (million USD)** | **14.75** | **6.90** | **3.24** | **1.37** | **0.36** | **0.00** |

* 10% discount rate (yellow highlighted column) is assumed to calculate NPV in this study due to the uncertainty of fund source between equity and loan.

Similarly, this calculation is done for discount rate of 0%, 10% 15% and 20%. Additionally, the IRR of the plant is calculated to be 22.73% where at this discount rate, NPV is 0 as shown in Table F.1. Moreover, the ROI can be calculated as shown below:

This results in ROI of 34.49%.

# References

[1] G. Towler, R. Sinnott, Chemical Engineering Design: Principles, Practice and Economics of Plant and Process Design, Elsevier Science2013.

[2] C. Maxwell, Cost Indices, 2022. <https://www.toweringskills.com/financial-analysis/cost-indices/>.

[3] Matches, Matches' Process Equipment Cost Estimates, (2014).

[4] QMC Technologies Inc., 1 in. Tee - NPT Threaded 150# Cast 304 Stainless Steel Pipe Fitting, (2022).

[5] RS Components, EMERSON – ASCO Pressure Reducing Valve, 1/2 in G, 2021. <https://my.rs-online.com/web/p/pressure-reducing-valves/3033621>.

[6] M.S. Peters, K.D. Timmerhaus, R.E. West, Plant Design and Economics for Chemical Engineers, McGraw-Hill Education2003.
